# Supplementary material
Source: PubMed Central journal article supplement (PMC3302681)
Supplement: CJN.04820511_CJN04820511SupplementaryData.pdf [file CJN.04820511_CJN04820511SupplementaryData.pdf]

## Supplemental materials

**Supplemental Table 1.** Pathologic findings of IgA nephropathy presented as NS according to clinical responses

| Characteristics                              | CR        |           |            | PR (n=32) | NR (n=20) | P     |
|----------------------------------------------|-----------|-----------|------------|-----------|-----------|-------|
|                                              | SR (n=24) | IS (n=24) | All (n=48) |           |           |       |
| Haas classification, n (%)                   |           |           |            |           |           | 0.001 |
| Class I                                      | 2 (8.3)   | 3 (12.5)  | 5 (10.4)   | 2 (6.3)   | 1 (5.0)   |       |
| Class II                                     | 5 (20.8)  | 7 (29.2)  | 12 (25.0)  | 1 (3.1)   | 2 (10.0)  |       |
| Class III                                    | 6 (25.0)  | 7 (29.2)  | 13 (27.1)  | 10 (31.3) | 3 (15.0)  |       |
| Class IV                                     | 7 (29.2)  | 7 (29.2)  | 14 (29.2)  | 16 (50.0) | 7 (35.0)  |       |
| Class V                                      | 4 (16.7)  | 0 (0.0)   | 4 (8.3)    | 3 (9.4)   | 7 (35.0)  |       |
| Mesangial hypercellularity, n (%)            |           |           |            |           |           | 0.07  |
| M0                                           | 10 (41.7) | 9 (37.5)  | 19 (39.6)  | 6 (18.8)  | 5 (25.0)  |       |
| M1                                           | 14 (58.3) | 15 (62.5) | 29 (60.4)  | 26 (81.2) | 15 (75.0) |       |
| Segmental sclerosis, n (%)                   |           |           |            |           |           | 0.26  |
| S0                                           | 9 (37.5)  | 11 (45.8) | 20 (41.7)  | 18 (56.3) | 10 (50.0) |       |
| S1                                           | 15 (62.5) | 13 (54.2) | 28 (58.3)  | 14 (43.2) | 10 (50.0) |       |
| Endocapillary proliferation, n (%)           |           |           |            |           |           | 0.79  |
| E0                                           | 15 (62.5) | 18 (75.0) | 33 (68.8)  | 21 (65.6) | 14 (70.0) |       |
| E1                                           | 9 (37.5)  | 6 (25.0)  | 15 (31.2)  | 11 (34.4) | 6 (30.0)  |       |
| Tubular atrophy/Interstitial fibrosis, n (%) |           |           |            |           |           | 0.01  |
| T0                                           | 22 (91.7) | 21 (87.5) | 43 (89.6)  | 26 (81.3) | 13 (65.0) |       |
| T1                                           | 2 (8.3)   | 3 (12.5)  | 5 (10.4)   | 5 (15.6)  | 5 (25.0)  |       |
| T2                                           | 0 (0.0)   | 0 (0.0)   | 0 (0.0)    | 1 (3.1)   | 2 (10.0)  |       |

|                                |           |           |           |           |           |      |
|--------------------------------|-----------|-----------|-----------|-----------|-----------|------|
| Foot process effacement, n (%) |           |           |           |           |           | 0.15 |
| none                           | 1 (4.2)   | 1 (4.2)   | 2 (4.2)   | 2 (6.3)   | 3 (15.0)  |      |
| focal                          | 10 (41.7) | 10 (41.7) | 20 (41.7) | 14 (43.8) | 6 (30.0)  |      |
| multifocal                     | 2 (8.3)   | 5 (20.8)  | 7 (14.6)  | 5 (15.6)  | 3 (15.0)  |      |
| diffuse                        | 11 (45.8) | 8 (33.3)  | 19 (39.5) | 11 (34.4) | 8 (40.0)  |      |
| IgA deposits, n (%)            |           |           |           |           |           | 0.48 |
| 1+                             | 7 (29.2)  | 8 (33.3)  | 15 (31.3) | 12 (37.5) | 7 (35.0)  |      |
| 2+                             | 11 (45.8) | 12 (50.0) | 23 (47.9) | 16 (50.0) | 9 (45.0)  |      |
| 3+                             | 6 (25.0)  | 4 (16.7)  | 10 (20.8) | 4 (12.5)  | 4 (20.0)  |      |
| C3 deposits, n (%)             |           |           |           |           |           | 0.52 |
| 0~Trace                        | 3 (12.5)  | 2 (8.3)   | 5 (10.4)  | 3 (9.4)   | 1 (5.0)   |      |
| 1+                             | 16 (66.7) | 21 (87.5) | 37 (77.1) | 23 (71.9) | 14 (70.0) |      |
| 2+                             | 4 (16.7)  | 1 (4.2)   | 5 (10.4)  | 6 (18.8)  | 5 (25.0)  |      |
| 3+                             | 1 (4.1)   | 0 (0.0)   | 1 (2.1)   | 0 (0.0)   | 0 (0.0)   |      |

---

Abbreviations: NS, nephrotic syndrome; CR, complete remission; SR, spontaneous remission; IS, immunosuppressant; PR, partial remission; NR, no response or progression.

**Supplemental Table 2.** Renal outcomes according to the presence of NS in patients with IgA nephropathy

| Parameter         | Model 1          |        | Model 2          |        | Model 3          |        | Model 4          |        |
|-------------------|------------------|--------|------------------|--------|------------------|--------|------------------|--------|
|                   | HR (95% CI)      | P      |
| Primary outcome   |                  |        |                  |        |                  |        |                  |        |
| NS                | 5.05 (3.11-8.21) | <0.001 | 4.90 (3.01-7.96) | <0.001 | 3.46 (2.03-5.92) | <0.001 | 2.08 (1.19-3.64) | 0.01   |
| Non-NS            | 1.00 (reference) |        | 1.00 (reference) |        | 1.00 (reference) |        | 1.00 (reference) |        |
| Secondary outcome |                  |        |                  |        |                  |        |                  |        |
| NS                | 5.70 (3.48-9.35) | <0.001 | 5.53 (3.37-9.07) | <0.001 | 4.86 (2.92-8.09) | <0.001 | 2.89 (1.68-5.00) | <0.001 |
| Non-NS            | 1.00 (reference) |        | 1.00 (reference) |        | 1.00 (reference) |        | 1.00(reference)  |        |

Model 1.Adjusted for age, sex, and diabetes

Model 2.Adjusted for Model 1 variables + mean arterial pressure

Model 3.Adjusted for Model 2 variables + serum creatinine levels and pathologic findings

Model 4.Adjusted for Model 3 variables + use of RAS blockers and treatment with immunosuppression with high-dose corticosteroids

Abbreviations: HR, hazard ratio; NS, nephrotic syndrome

**Supplemental Table 3.** Clinical outcomes of IgA nephropathy patients with NS (n=100)

|                                                             | CR                 |                     |                     | PR (n=32)           | NR (n=20)           | P       |
|-------------------------------------------------------------|--------------------|---------------------|---------------------|---------------------|---------------------|---------|
|                                                             | SR (n=24)          | IS (n=24)           | All (n=48)          |                     |                     |         |
| FU duration (months)*                                       | 37.8 (10.7 – 82.4) | 47.5 (11.0 – 107.8) | 42.5 (11.0 – 107.8) | 36.1 (12.0 – 104.6) | 52.5 (10.7 – 107.8) | -       |
| Time to CR (days)*                                          | 154 (32 - 637)     | 180 (27 - 867)      | 172 (27 - 867)      | -                   | -                   | -       |
| Time to proteinuria reduction<br>>50% from baseline (days)* | 52 (14 – 163)      | 44 (15 - 183)       | 47 (14 - 183)       | -                   | -                   | -       |
| Relapse, n (%)                                              | 2 (8.3)            | 11 (45.8)           | 13 (27.1)           | -                   | -                   | <0.001† |
| Time to first relapse (months)*                             | 37.0 and 60.0      | 10.0 (1.0-33.0)     | 10.5 (1.0-60.0)     | 19.6 (4.1-54.3)     | -                   |         |
| Primary endpoint, n (%)                                     | 0 (0.0)            | 2 (8.3)             | 2 (4.2)             | 5 (15.7)            | 17 (85.0)           | <0.001  |
| Secondary endpoints, n (%)                                  |                    |                     |                     |                     |                     | <0.001  |
| ESRD                                                        | 0 (0.0)            | 0 (0.0)             | 0 (0.0)             | 2 (6.3)             | 9 (35.0)            |         |
| Death                                                       | 0 (0.0)            | 0 (0.0)             | 0 (0.0)             | 0 (0.0)             | 2 (10.0)            |         |

\* Data are expressed as median with ranges.

Abbreviations: CR, complete remission; SR, spontaneous remission; IS, immunosuppressant; PR, partial remission; NR, no response or progression; FU, follow-up; ESRD, end-stage renal disease

† P-value between the SR group and the IS group

**Supplemental Table 4.** Cox proportional hazard model for the primary endpoint in IgA nephropathy patients with NS (n=100)

|                                                                                     | Unadjusted           |        | Adjusted*              |        | Adjusted*              |        |
|-------------------------------------------------------------------------------------|----------------------|--------|------------------------|--------|------------------------|--------|
|                                                                                     | HR (95% CI)          | P      | HR (95% CI)            | P      | HR (95% CI)            | P      |
| Gender (male vs. female)                                                            | 1.38 (0.64-3.01)     | 0.44   | 1.14 (0.35-3.76)       | 0.42   | 1.26 (0.62-5.75)       | 0.74   |
| Age (per 1 year)                                                                    | 0.99 (0.96-1.03)     | 0.91   | 0.99 (0.99-1.03)       | 0.74   | 0.99 (0.96-1.03)       | 0.61   |
| DM (vs. non-DM)                                                                     | 0.89 (0.11-5.86)     | 0.84   | 3.72 (0.35-39.09)      | 0.31   | 1.58 (0.14-22.47)      | 0.74   |
| Baseline 24-hr proteinuria (per 1 g/day)                                            | 1.68 (1.17-3.28)     | 0.04   | 1.01 (0.88-1.31)       | 0.80   | 1.13 (0.96-1.50)       | 0.12   |
| Mean arterial pressure (per 1 mmHg)                                                 | 1.01 (0.99-1.04)     | 0.31   | 1.00 (0.95-1.06)       | 0.94   | 1.02 (0.95-1.10)       | 0.98   |
| Estimated GFR <60 mL/min/1.73m <sup>2</sup><br>(vs. ≥60 mL/min/1.73m <sup>2</sup> ) | 2.74 (1.04-7.24)     | 0.04   | 2.92 (1.10-8.01)       | 0.03   | 2.23 (1.05-5.00)       | 0.04   |
| Clinical responses                                                                  |                      |        |                        |        |                        |        |
| CR                                                                                  | 1.00 (reference)     |        | 1.00 (reference)       |        | 1.00 (reference)       | -      |
| PR                                                                                  | 8.66 (1.04-72.24)    | 0.46   | 13.10 (1.32-130.94)    | 0.03   | 5.89 (0.66-52.94)      | 0.08   |
| NR                                                                                  | 90.96 (11.71-706.48) | <0.001 | 157.73 (14.73-1688.92) | <0.001 | 114.76 (12.60-1031.86) | <0.001 |
| Haas classification                                                                 |                      |        |                        |        |                        |        |
| class I + II                                                                        | 1.00 (reference)     |        | 1.00 (reference)       | -      | -                      | -      |
| class III                                                                           | 1.83 (0.40-8.38)     | 0.46   | 0.96 (0.19-4.97)       | 0.91   | -                      | -      |
| class IV                                                                            | 2.43 (0.67-8.89)     | 0.21   | 0.34 (0.06-2.01)       | 0.22   | -                      | -      |
| class V                                                                             | 8.97 (2.57-45.96)    | 0.001  | 1.50 (0.23-5.36)       | 0.63   | -                      | -      |
| Oxford classification                                                               |                      |        |                        |        |                        |        |
| M1 (vs. M0)                                                                         | 2.23 (0.83-6.01)     | 0.14   | -                      | -      | 2.54 (0.78-8.35)       | 0.14   |
| E1 (vs. E0)                                                                         | 0.93 (0.41-2.08)     | 0.98   | -                      | -      | 0.96 (0.26-1.53)       | 0.33   |
| S1 (vs. S0)                                                                         | 1.10 (0.50-2.34)     | 0.83   | -                      | -      | 2.28 (0.75-6.98)       | 0.24   |
| T1+T2 (vs. T0)                                                                      | 2.52 (1.07-5.88)     | 0.03   | -                      | -      | 0.86 (0.24-2.42)       | 0.61   |

Abbreviations: HR, hazard ratio; DM, Diabetes mellitus; CR, complete remission; PR, partial remission; NR, no response or progression; eGFR estimated glomerular filtration rate; M, mesangial proliferation; E, endocapillary proliferation; S, segmental sclerosis; T, tubular atrophy/Interstitial fibrosis

\* adjusted for gender, age, DM, baseline 24-hr proteinuria, mean arterial pressure, estimated GFR, and pathologic findings.

**Supplemental Table 5.** Cox proportional hazard model for prediction of CR of NS in patients with IgA nephropathy

|                                                                                           | Unadjusted         |        | Adjusted*           |        | Adjusted*           |        |
|-------------------------------------------------------------------------------------------|--------------------|--------|---------------------|--------|---------------------|--------|
|                                                                                           | HR (95% CI)        | P      | HR (95% CI)         | P      | HR (95% CI)         | P      |
| Gender (female vs. male)                                                                  | 1.30 (0.74-2.30)   | 0.36   | 2.03 (1.12-3.93)    | 0.03   | 1.79 (1.02-3.64)    | 0.07   |
| Age (per 1 year)                                                                          | 0.99 (0.98-1.02)   | 0.80   | 1.01 (0.98-1.03)    | 0.41   | 1.01 (0.99-1.04)    | 0.37   |
| Mean arterial pressure (per 1 mmHg)                                                       | 0.98 (0.95-1.02)   | 0.28   | 0.99 (0.96-1.02)    | 0.38   | 0.99 (0.96-1.04)    | 0.64   |
| Baseline 24-hr proteinuria (per 1 g/day)                                                  | 0.96 (0.88-1.07)   | 0.48   | 0.90 (0.80-1.35)    | 0.11   | 0.91 (0.80-1.04)    | 0.16   |
| Proteinuria decrease >50% within 3 mo                                                     | 13.52 (6.99-26.10) | <0.001 | 27.14 (10.84-67.94) | <0.001 | 26.16 (10.42-65.63) | <0.001 |
| Estimated GFR $\geq 60$ mL/min/1.73m <sup>2</sup><br>(vs. <60 mL/min/1.73m <sup>2</sup> ) | 2.14 (0.91-5.04)   | 0.08   | 1.14 (0.48-2.81)    | 0.78   | 1.87 (0.58-3.63)    | 0.22   |
| Treatment with corticosteroid                                                             | 1.07 (0.61-1.90)   | 0.72   | 1.88 (1.01-3.70)    | 0.06   | 2.31 (1.14-4.31)    | 0.02   |
| Haas classification                                                                       |                    |        |                     |        |                     |        |
| class I + II                                                                              | 5.74 (1.93-17.13)  | 0.002  | 8.12 (2.39-27.60)   | 0.001  | -                   | -      |
| class III                                                                                 | 2.39 (0.80-7.31)   | 0.12   | 3.32 (0.87-10.23)   | 0.05   | -                   | -      |
| class IV                                                                                  | 1.59 (0.52-4.83)   | 0.44   | 1.95 (0.66-6.30)    | 0.26   | -                   | -      |
| class V                                                                                   | 1.00 (reference)   | -      | 1.00 (reference)    | -      | -                   | -      |
| Oxford classification                                                                     |                    |        |                     |        |                     |        |
| M1 (vs. M0)                                                                               | 0.38 (0.22-0.68)   | 0.001  | -                   | -      | 0.40 (0.20-0.78)    | 0.01   |
| E1 (vs. E0)                                                                               | 0.92 (0.50-1.68)   | 0.79   | -                   | -      | 0.55 (0.61-2.50)    | 0.61   |
| S1 (vs. S0)                                                                               | 1.40 (0.80-2.53)   | 0.26   | -                   | -      | 1.51 (0.80-2.86)    | 0.20   |

|                |                  |      |   |   |                  |      |
|----------------|------------------|------|---|---|------------------|------|
| T1+T2 (vs. T0) | 0.45 (0.18-1.14) | 0.06 | - | - | 0.31 (0.11-0.88) | 0.03 |
|----------------|------------------|------|---|---|------------------|------|

---

Abbreviations: HR, hazard ratio; eGFR, estimated glomerular filtration rate; M, mesangial proliferation; E, endocapillary proliferation; S, segmental sclerosis; T, tubular atrophy/Interstitial fibrosis

\* adjusted for gender, age, mean arterial pressure, baseline 24-hr proteinuria, a > 50% decrease in proteinuria within 3 month, eGFR, treatment with steroid, and pathologic findings.
